# Supplementary material for: Removal of emerging contaminants by pre-mixed PACl and carbonaceous materials
Source: Royal Society of Chemistry journal article supplement (doi:10.1039/c5ra03183d), 2015-01-01
Supplement: c5ra03183d1.pdf [file c5ra03183d1.pdf]

### Supplementary Information

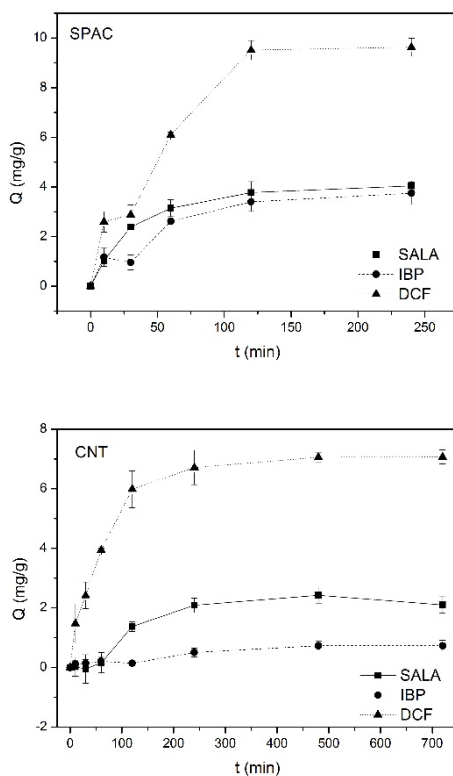

Fig. S1 Equilibrium time of ECs adsorbed onto SPAC and CNT with the dosage of 100mg/L.

Table. S1 Characteristics of source water, effluent water and synthetic water.

|                 | pH   | DOC (mg/L) | UV254 (1/cm) | SS (mg/L) |
|-----------------|------|------------|--------------|-----------|
| Source water    | 7.64 | 2.71       | 0.03         | 1.14      |
| Effluent water  | 6.72 | 20.53      | 0.14         | 11.5      |
| Synthetic water | 7.41 | 2.13       | 0.02         | 1.04      |

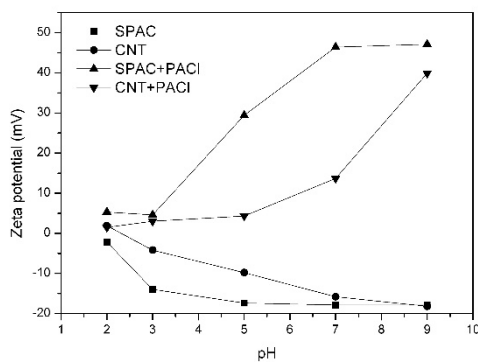

Fig. S2 Zeta potential of SPAC/CNT with or without PACl at different pH
